# Supplementary material for: Inferring and evaluating satellite-based constraints on NOx emissions estimates in air quality simulations
Source: Copernicus journal article supplement (doi:10.5194/acp-2022-435), 2022-07-25
Supplement: Supplementary file 1 [file acp-2022-435-supplement.pdf]

# Inferring and evaluating satellite-based constraints on NO<sub>x</sub> emissions estimates in air quality simulations

James D. East<sup>1,2</sup>, Barron H. Henderson<sup>3</sup>, Sergey L. Napelenok<sup>3</sup>, Shannon N. Koplitz<sup>3</sup>, Golam Sarwar<sup>3</sup>, Robert Gilliam<sup>3</sup>, Allen Lenzen<sup>4</sup>, Daniel Q. Tong<sup>5</sup>, R. Bradley Pierce<sup>4</sup>, Fernando Garcia-Menendez<sup>1</sup>

5 <sup>1</sup>Department of Civil, Construction, and Environmental Engineering, North Carolina State University, Raleigh, NC 27695, USA

<sup>2</sup>Oak Ridge Institute for Science and Education, Office of Research and Development, U.S. Environmental Protection Agency, Research Triangle Park, NC 27711, USA

<sup>3</sup>U.S. Environmental Protection Agency, Research Triangle Park, NC 27711, USA

10 <sup>4</sup>Space Science and Engineering Center, University of Wisconsin-Madison, Madison, WI 53706, USA

<sup>5</sup>Department of Atmospheric, Oceanic and Earth Sciences, George Mason University, Fairfax, VA 22030 USA

*Correspondence to:* Fernando Garcia-Menendez (f\_garcia@ncsu.edu)

## Supplementary information

This file contains 11 figures and 3 tables. Further information is provided on monthly average inferred lightning NO<sub>x</sub> (LNO<sub>x</sub>) emissions (Figs. S1 and S2), analysis increment in the lower and upper troposphere (Fig. S3), inversion framework testing results (Fig. S4), seasonal mean Jacobian ( $\beta$ ) values (Fig. S5), impact of NO<sub>x</sub> emissions updates on modeled NO<sub>2</sub> VCDs during each season (Figs. S6-S9), emissions increments for TROPOMI v1.2.2 and TROPOMI v2.3.1 (Fig. S10), prior and posterior emissions totals for January 2019 including TROPOMI v2.3.1 posterior (Fig. S11), all CMAQ simulations performed for this study (Table S1), and CMAQ model performance evaluated against ground O<sub>3</sub> observations (Table S2) and NO<sub>2</sub> observations (Table S3).

20

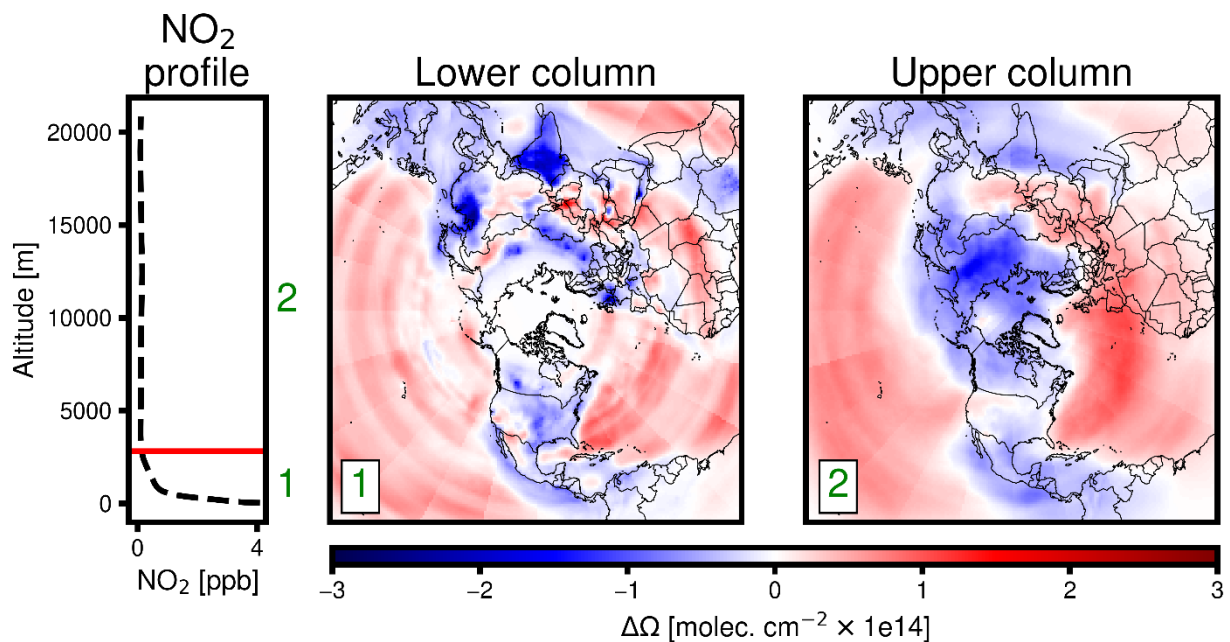

25

**Figure S1:** Left panel: Vertical concentration profile of monthly-averaged July NO<sub>2</sub> for the model grid cell containing New York City. Red line indicates the cut-off used for lower troposphere in the emissions inversion. Center and right panels: Monthly average difference in modeled NO<sub>2</sub> columns between simulations with and without assimilated NO<sub>2</sub> satellite data ( $\Delta\Omega$ ), for lower (1) and upper (2) column regions defined by the emissions inversion cutoff.  $\Delta\Omega$  is shown for one iteration of assimilating July 2019 TROPOMI NO<sub>2</sub> with background errors for the boundary layer and LNO<sub>x</sub> emissions updates applied.

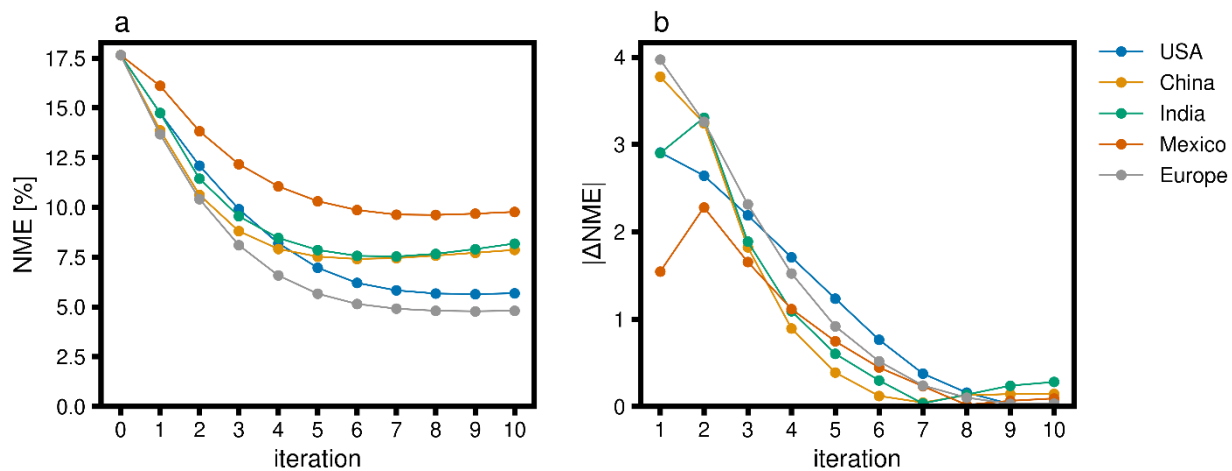

30 **Figure S2:** Synthetic inversion test results showing (a) NME (%) by region for each iteration of FDMB, and (b) change in NME (%) by region for each iteration of FDMB. Synthetic observations are created by a simulation initialized with a uniform 15% reduction in anthropogenic  $\text{NO}_x$  emissions. Errors are computed using the VCDs within five regions of the Northern Hemisphere including only grid cells that are included in the inversion according to the filtering criteria described in Sect. 2.5.

LNOx adjustments inferred by OMI

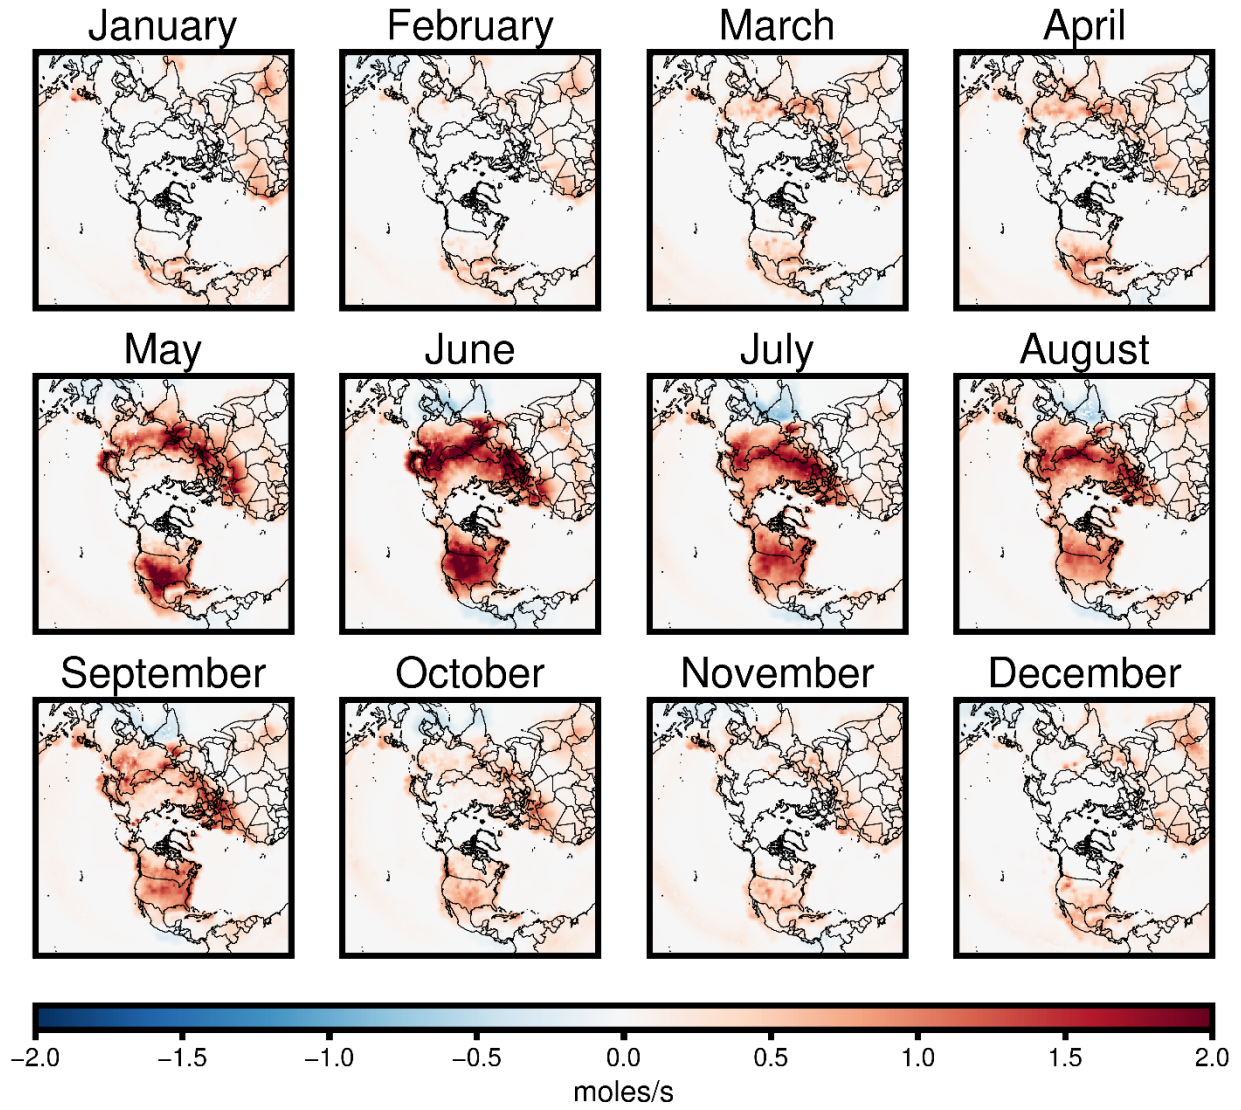

35 **Figure S3:** Monthly-average 2019 LNOx emissions changes inferred from OMI observations.

LNOx adjustments inferred by TROPOMI

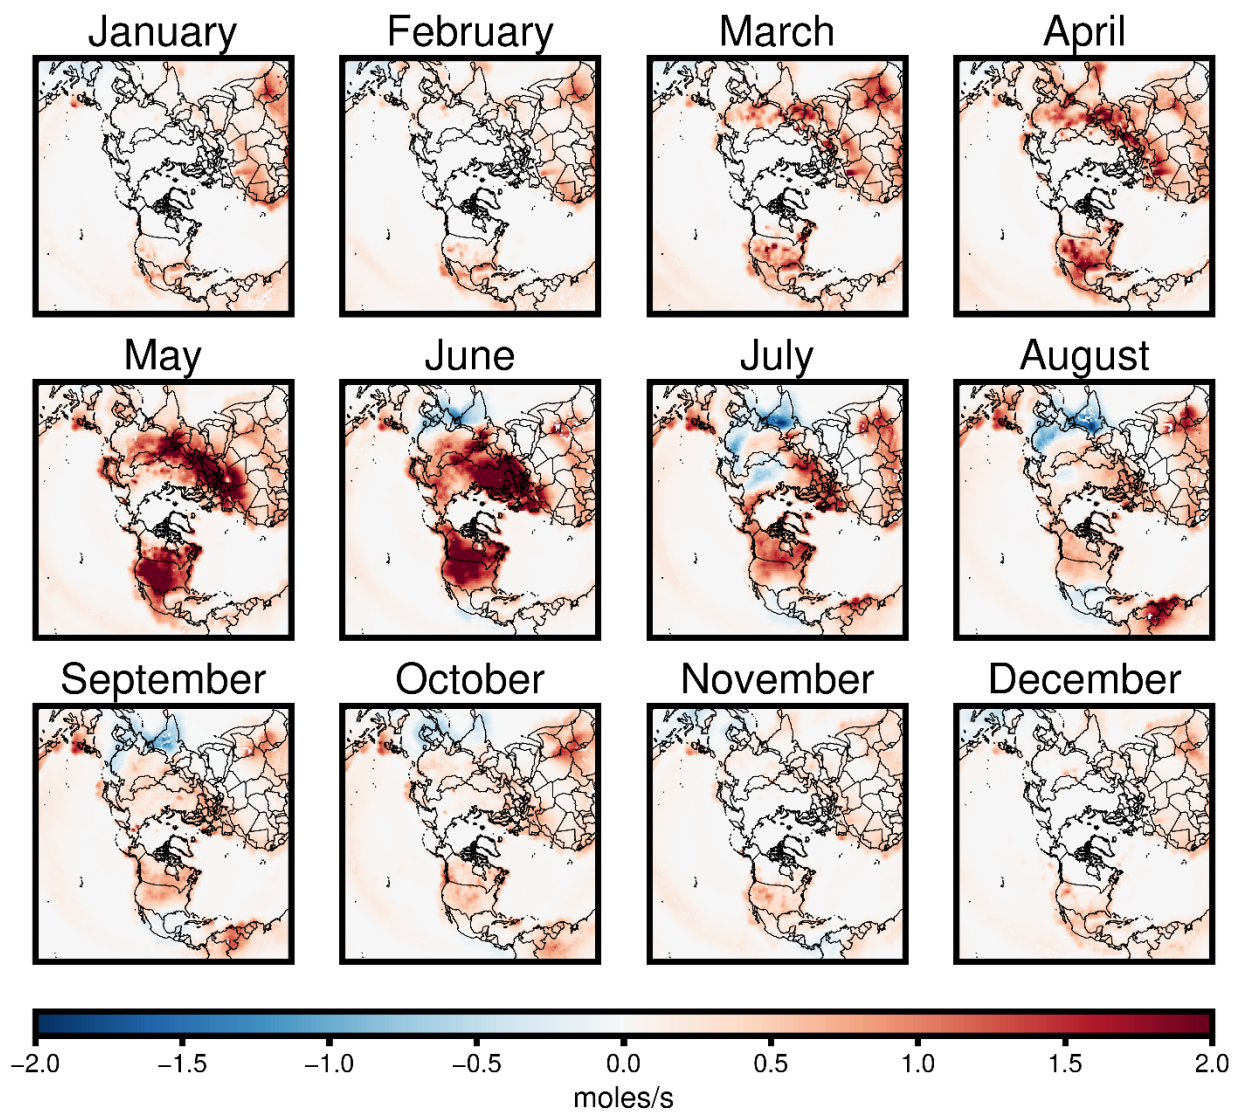

**Figure S4:** Monthly-average 2019 LNOx emissions changes inferred from TROPOMI observations.

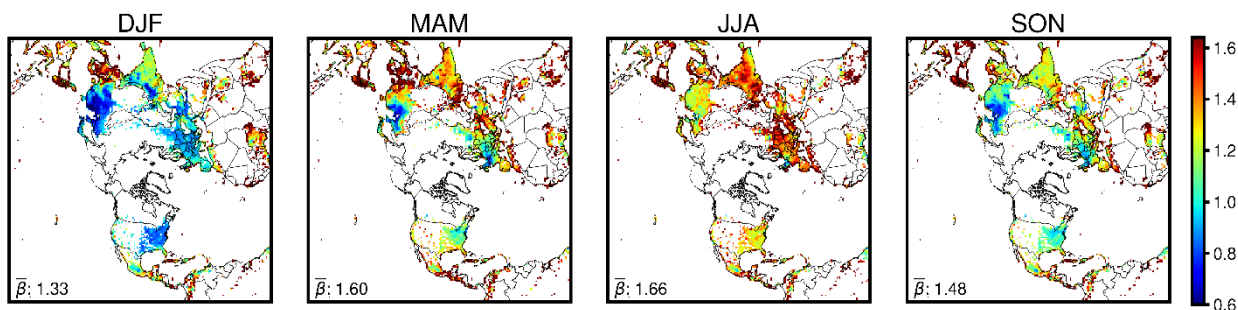

40 **Figure S5:** Seasonal mean Jacobian ( $\beta$ ) relating changes in  $\text{NO}_x$  emissions to changes in the lower tropospheric  $\text{NO}_2$  vertical column.  $\beta$  shown for winter (DJF), spring (MAM), summer (JJA), and fall (SON). Domain-average values across ( $\bar{\beta}$ ) are indicated on each map.

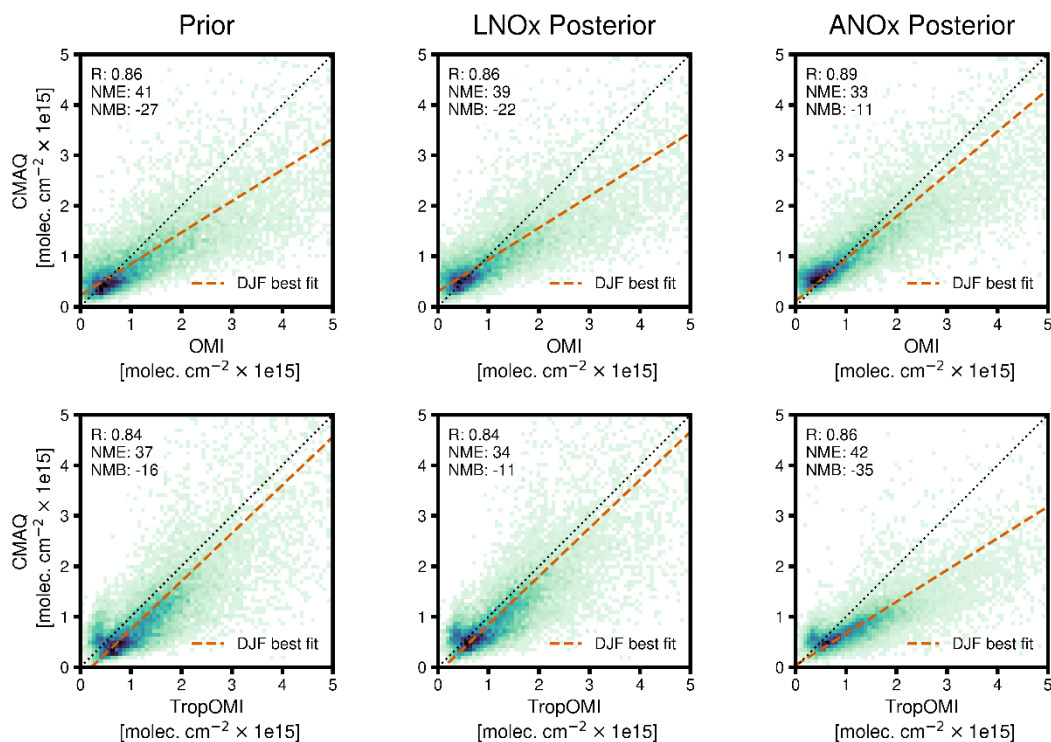

45 **Figure S6:** Impact of  $\text{NO}_x$  emissions updates on modeled  $\text{NO}_2$  VCD during winter (December, January, and February). Plots compare 2019  
 50 monthly-average CMAQ-modeled  $\text{NO}_2$  VCD at each domain grid cell in which  $\text{NO}_x$  emissions were updated by the inverse modeling system against OMI and TROPOMI tropospheric  $\text{NO}_2$  VCD retrievals averaged in each cell. Modeled  $\text{NO}_2$  VCD using prior emissions (Prior), inferred LNOx emissions (LNOx posterior), and inferred lightning and anthropogenic  $\text{NO}_x$  emissions (ANOx posterior) are each compared with  $\text{NO}_2$  VCD retrievals. Top row plots compare retrievals and modeled VCD based on OMI observations, while bottom row plots compare retrievals and modeled VCD based on TROPOMI observations. Linear regression line, coefficient of determination (R), normalized mean error (NME), and normalized mean bias (NMB), relative to tropospheric  $\text{NO}_2$  VCD retrievals, are shown for each CMAQ simulation.

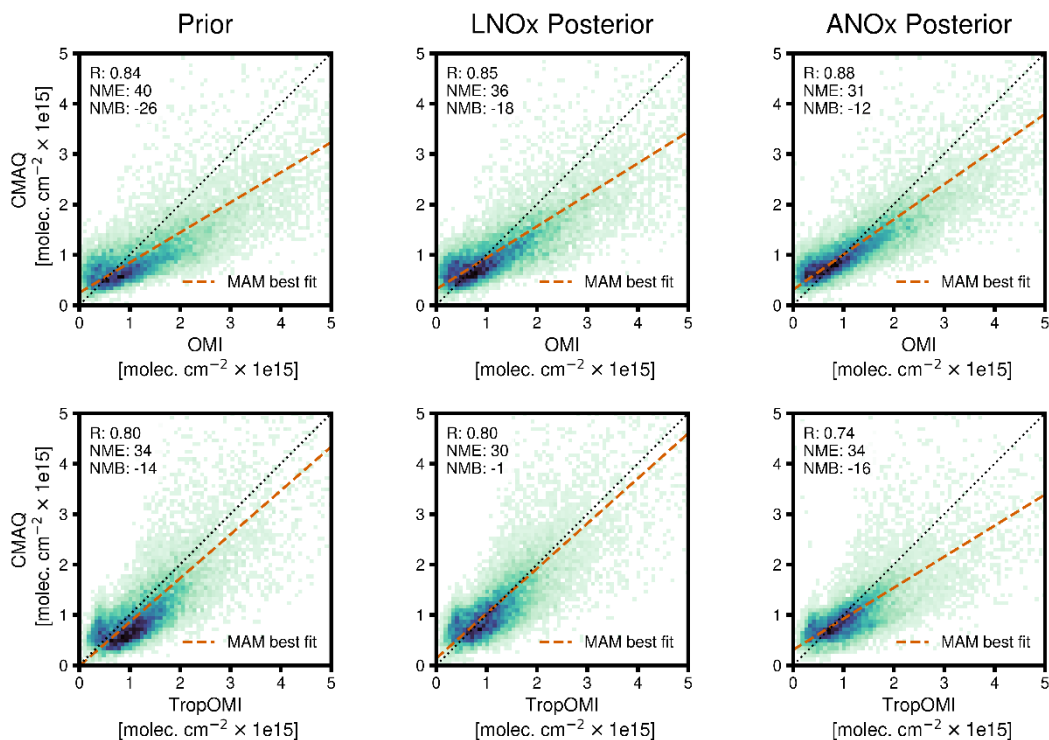

**Figure S7:** Impact of NO<sub>x</sub> emissions updates on modeled NO<sub>2</sub> VCD during spring (March, April, and May). Plots compare 2019 monthly-average CMAQ-modeled NO<sub>2</sub> VCD at each domain grid cell in which NO<sub>x</sub> emissions were updated by the inverse modeling system against OMI and TROPOMI tropospheric NO<sub>2</sub> VCD retrievals averaged in each cell. Modeled NO<sub>2</sub> VCD using prior emissions (Prior), inferred LNO<sub>x</sub> emissions (LNO<sub>x</sub> posterior), and inferred lightning and anthropogenic NO<sub>x</sub> emissions (ANO<sub>x</sub> posterior) are each compared with NO<sub>2</sub> VCD retrievals. Top row plots compare retrievals and modeled VCD based on OMI observations, while bottom row plots compare retrievals and modeled VCD based on TROPOMI observations. Linear regression line, coefficient of determination (R), normalized mean error (NME), and normalized mean bias (NMB), relative to tropospheric NO<sub>2</sub> VCD retrievals, are shown for each CMAQ simulation.

55

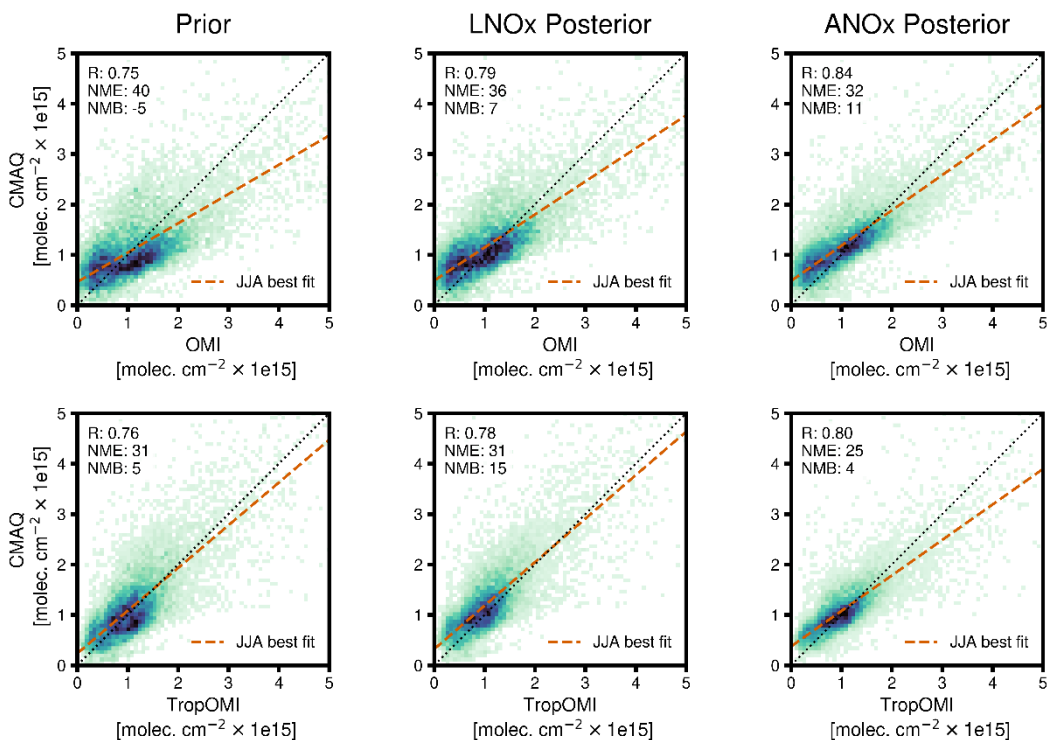

60

**Figure S8:** Impact of NO<sub>x</sub> emissions updates on modeled NO<sub>2</sub> VCD during summer (June, July, and August). Plots compare 2019 monthly-average CMAQ-modeled NO<sub>2</sub> VCD at each domain grid cell in which NO<sub>x</sub> emissions were updated by the inverse modeling system against OMI and TROPOMI tropospheric NO<sub>2</sub> VCD retrievals averaged in each cell. Modeled NO<sub>2</sub> VCD using prior emissions (Prior), inferred LNO<sub>x</sub> emissions (LNO<sub>x</sub> posterior), and inferred lightning and anthropogenic NO<sub>x</sub> emissions (ANO<sub>x</sub> posterior) are each compared with NO<sub>2</sub> VCD retrievals. Top row plots compare retrievals and modeled VCD based on OMI observations, while bottom row plots compare retrievals and modeled VCD based on TROPOMI observations. Linear regression line, coefficient of determination (R), normalized mean error (NME), and normalized mean bias (NMB), relative to tropospheric NO<sub>2</sub> VCD retrievals, are shown for each CMAQ simulation.

65



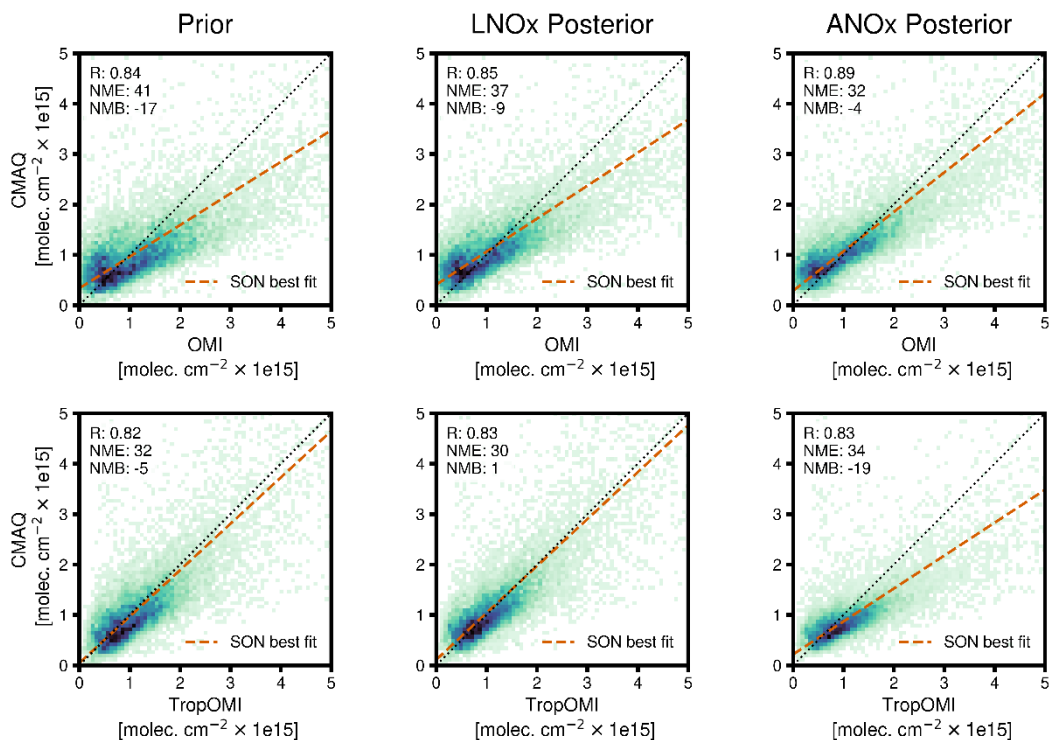

70 **Figure S9:** Impact of NO<sub>x</sub> emissions updates on modeled NO<sub>2</sub> VCD during autumn (September, October, and November). Plots compare  
 2019 monthly-average CMAQ-modeled NO<sub>2</sub> VCD at each domain grid cell in which NO<sub>x</sub> emissions were updated by the inverse modeling  
 system against OMI and TROPOMI tropospheric NO<sub>2</sub> VCD retrievals averaged in each cell. Modeled NO<sub>2</sub> VCD using prior emissions  
 (Prior), inferred LNO<sub>x</sub> emissions (LNO<sub>x</sub> posterior), and inferred lightning and anthropogenic NO<sub>x</sub> emissions (ANO<sub>x</sub> posterior) are each  
 compared with NO<sub>2</sub> VCD retrievals. Top row plots compare retrievals and modeled VCD based on OMI observations, while bottom row  
 75 plots compare retrievals and modeled VCD based on TROPOMI observations. Linear regression line, coefficient of determination (R),  
 normalized mean error (NME), and normalized mean bias (NMB), relative to tropospheric NO<sub>2</sub> VCD retrievals, are shown for each CMAQ  
 simulation.

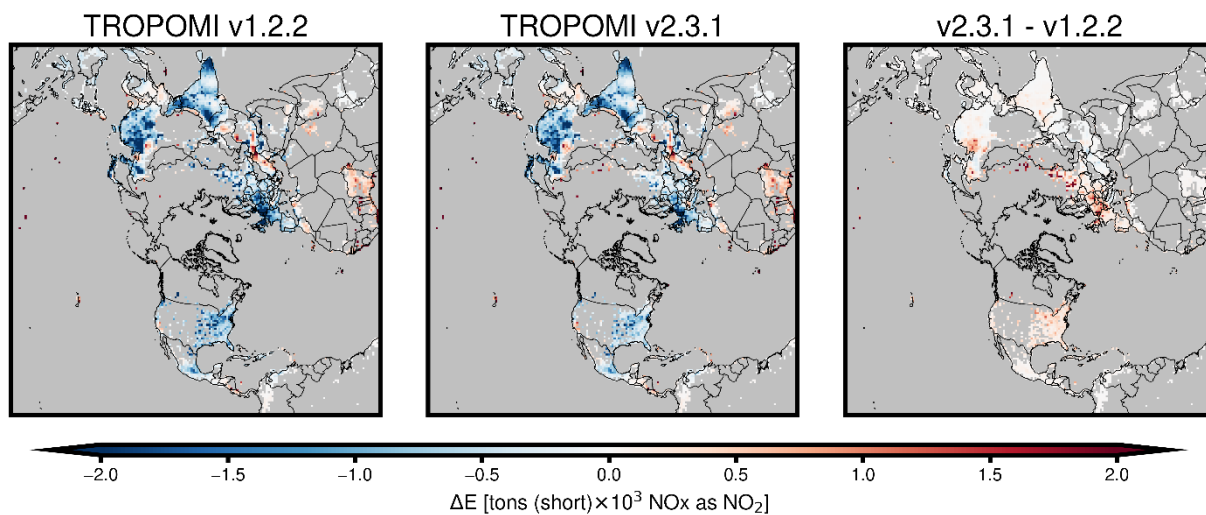

80

**Figure S10:** Anthropogenic NO<sub>x</sub> emissions increment for January 2019 inferred from TROPOMI version 1.2.2 and version 2.3.1 NO<sub>2</sub> observations, and difference in the analysis increment based on the two datasets.

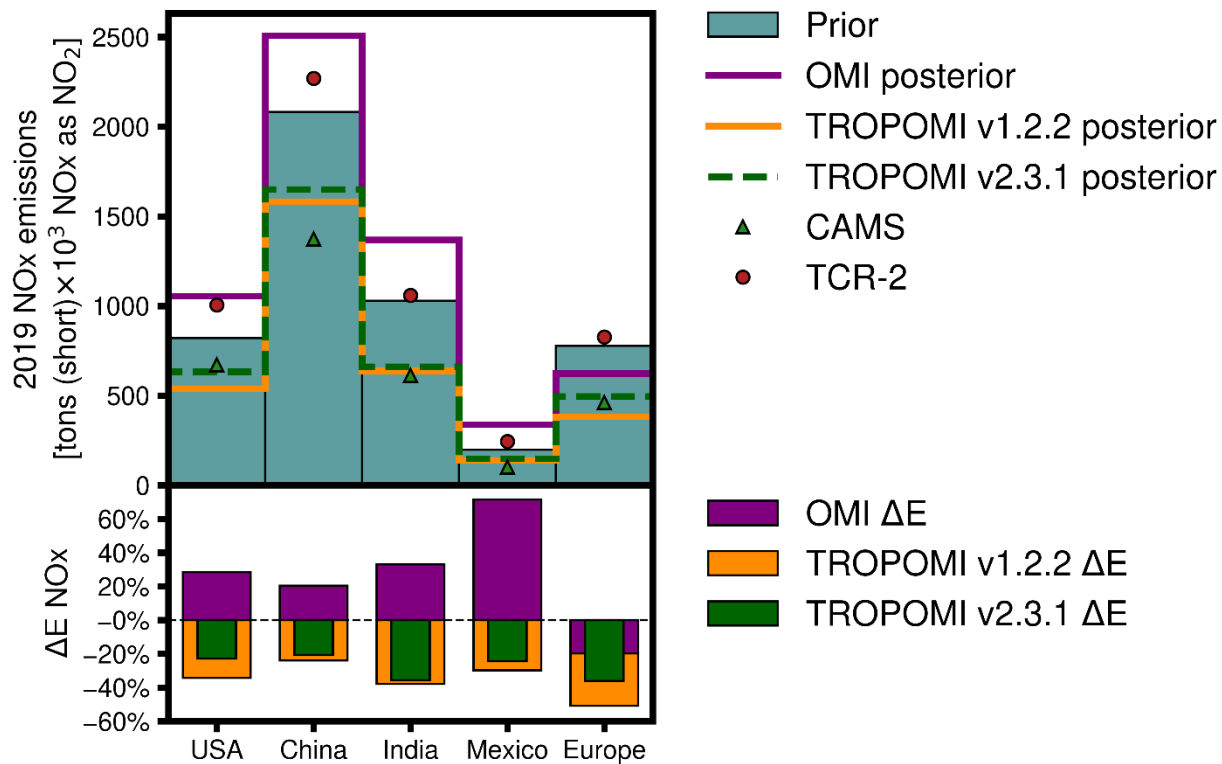

85

**Figure S11:** Prior and satellite-inferred January 2019 anthropogenic NO<sub>x</sub> emissions in select global regions. Top plot shows total emissions (as NO<sub>2</sub>) from prior emissions estimates, inference with TROPOMI version 1.2.2 and 2.3.1 observations (TROPOMI v1.2.2 and v2.3.1 posterior), inference with OMI (OMI posterior), and CAMS or TCR-2 inventories in the U.S., China, India, Mexico, and Europe. The bottom plot shows the percent change ( $\Delta E$  NO<sub>x</sub>) inferred with OMI or TROPOMI data, relative to prior emission estimates, for each region.

90

**Table S1:** Hemispheric CMAQ simulations conducted as part of this study

| <b>Simulation</b>                | <b>Satellite data assimilated</b> | <b>Anthropogenic Emissions (initial)</b> | <b>LNO<sub>x</sub> emissions</b> | <b>Emissions perturbation</b> | <b>Iteration</b> | <b>Used for emissions adjustment</b> |
|----------------------------------|-----------------------------------|------------------------------------------|----------------------------------|-------------------------------|------------------|--------------------------------------|
| Base                             | -                                 | Prior                                    | Prior                            | -                             | No               | -                                    |
| No LNO <sub>x</sub>              | -                                 | Prior                                    | Prior                            | 0% LNO <sub>x</sub>           | No               | -                                    |
| OMI LNO <sub>x</sub> update      | OMI NO <sub>2</sub>               | Prior                                    | Prior                            | -                             | No               | LNO <sub>x</sub>                     |
| TROPOMI LNO <sub>x</sub> update  | TROPOMI NO <sub>2</sub>           | Prior                                    | Prior                            | -                             | No               | LNO <sub>x</sub>                     |
| OMI Base LNO <sub>x</sub>        | -                                 | Prior                                    | Posterior (OMI)                  | -                             | No               | -                                    |
| OMI ANO <sub>x</sub> reduced     | -                                 | Prior                                    | Posterior (OMI)                  | ANO <sub>x</sub> 15% reduced  | No               | -                                    |
| OMI ANO <sub>x</sub> update      | OMI NO <sub>2</sub>               | Prior                                    | Posterior (OMI)                  | -                             | Yes              | ANO <sub>x</sub>                     |
| OMI posterior                    | -                                 | Posterior (OMI)                          | Posterior (OMI)                  | -                             | No               | -                                    |
| TROPOMI Base LNO <sub>x</sub>    | -                                 | Prior                                    | Posterior (TropOMI)              | -                             | No               | -                                    |
| TROPOMI ANO <sub>x</sub> reduced | -                                 | Prior                                    | Posterior (TropOMI)              | ANO <sub>x</sub> 15% reduced  | No               | -                                    |
| TROPOMI ANO <sub>x</sub> update  | TROPOMI NO <sub>2</sub>           | Prior                                    | Posterior (TropOMI)              | -                             | Yes              | ANO <sub>x</sub>                     |
| TROPOMI posterior                | -                                 | Posterior (TropOMI)                      | Posterior (TropOMI)              | -                             | No               | -                                    |

**Table S2:** CMAQ model performance evaluated against daily maximum 8-hour O<sub>3</sub> concentrations (MDA<sub>8</sub> O<sub>3</sub>) observed in 2019 by 1,218 AQS monitoring sites in the U.S., during winter (Dec.-Feb.), spring (Mar.-May), summer (Jun.-Aug.), and fall (Sep.-Nov.) months. Near-road monitors are not considered. Statistics are shown for simulations using prior emissions (Prior), lightning and anthropogenic NO<sub>x</sub> emissions inferred with OMI data (OMI-inferred), and lightning and anthropogenic NO<sub>x</sub> emissions inferred with TROPOMI data (TROPOMI-inferred). Coefficient of determination (R), normalized mean error (NME), and normalized mean bias (NMB), relative to AQS observations, are estimated for each CMAQ simulation.

| Season | NO <sub>x</sub> emissions | R    | NME   | NMB    |
|--------|---------------------------|------|-------|--------|
| Winter | Prior                     | 0.60 | 15.8% | -4.8%  |
|        | OMI-inferred              | 0.61 | 15.0% | -0.5%  |
|        | TROPOMI-inferred          | 0.56 | 16.0% | -3.0%  |
| Spring | Prior                     | 0.53 | 15.9% | -10.2% |
|        | OMI-inferred              | 0.57 | 13.4% | -4.9%  |
|        | TROPOMI-inferred          | 0.55 | 16.6% | -11.6% |
| Summer | Prior                     | 0.58 | 17.2% | 6.8%   |
|        | OMI-inferred              | 0.65 | 17.8% | 11.8%  |
|        | TROPOMI-inferred          | 0.67 | 14.4% | 3.2%   |
| Fall   | Prior                     | 0.73 | 14.5% | 2.3%   |
|        | OMI-inferred              | 0.74 | 15.1% | 6.6%   |
|        | TROPOMI-inferred          | 0.73 | 14.3% | -1.0%  |

**Table S3:** CMAQ model performance evaluated against daily 24-h average NO<sub>2</sub> concentrations observed in 2019 by 1,218 AQS monitoring sites in the U.S., during winter (Dec.-Feb.), spring (Mar.-May), summer (Jun.-Aug.), and fall (Sep.-Nov.) months. Near-road monitors are not considered. Statistics are shown for simulations using prior emissions (Prior), lightning and anthropogenic NO<sub>x</sub> emissions inferred with OMI data (OMI-inferred), and lightning and anthropogenic NO<sub>x</sub> emissions inferred with TROPOMI data (TROPOMI-inferred). Coefficient of determination (R), normalized mean error (NME), and normalized mean bias (NMB), relative to AQS observations, are estimated for each CMAQ simulation.

| Season | NO <sub>x</sub> emissions | R    | NME   | NMB    |
|--------|---------------------------|------|-------|--------|
| Winter | Prior                     | 0.42 | 64.8% | -60.5% |
|        | OMI-inferred              | 0.47 | 57.4% | -49.3% |
|        | TROPOMI-inferred          | 0.47 | 76.3% | -75.4% |
| Spring | Prior                     | 0.45 | 64.2% | -59.7% |
|        | OMI-inferred              | 0.48 | 57.5% | -48.7% |
|        | TROPOMI-inferred          | 0.48 | 70.9% | -69.0% |
| Summer | Prior                     | 0.37 | 57.2% | -49.0% |
|        | OMI-inferred              | 0.39 | 55.4% | -46.0% |
|        | TROPOMI-inferred          | 0.43 | 63.3% | -59.5% |
| Fall   | Prior                     | 0.41 | 60.8% | -55.5% |
|        | OMI-inferred              | 0.53 | 58.5% | -53.1% |
|        | TROPOMI-inferred          | 0.44 | 72.4% | -71.0% |
